# Supplementary material
Source: HighWire-hosted journal article supplement (https://www.annfammed.org/highwire/filestream/7503/field_highwire_adjunct_files/0/Coco_Suppl_Table_1-4.pdf)
Supplement: Coco_Suppl_Table_1-4.pdf [file Coco_Suppl_Table_1-4.pdf]

Online Supplementary Material

Coco AS, Kleinhans E. The prevalence of primary HIV infection in symptomatic ambulatory patients.  
*Ann Fam Med.* 2005;3:400-404.

<http://www.annfammed.org/cgi/content/full/3/5/400/DC1>

**Supplemental Table 1. Annual Number of Patients Visiting Physician's Offices, Emergency Departments and Hospital Clinics With Fever and Other Top 3 Symptoms and Diagnoses Consistent With Primary HIV Infection**

| ICD-9-CM Codes | Diagnosis                                                 | Annual Number of Patients |
|----------------|-----------------------------------------------------------|---------------------------|
| 00000          | Blank                                                     | 2,226                     |
| 0088-          | Enteritis due to other organism, not elsewhere classified | 2,225                     |
| 0092-          | Infectious diarrhea                                       | 85,806                    |
| 0340-          | Streptococcal sore throat                                 | 299,778                   |
| 0389-          | Unspecified septicemia                                    | 1,593                     |
| 075--          | Infectious mononucleosis                                  | 77,563                    |
| 07999          | Unspecified viral infection                               | 268,973                   |
| 2765-          | Volume depletion                                          | 5,597                     |
| 30781          | Tension headache                                          | 12,712                    |
| 460--          | Acute nasopharyngitis-common cold                         | 1,641                     |
| 4619-          | Acute sinusitis, unspecified                              | 27,394                    |
| 462--          | Acute pharyngitis                                         | 393,303                   |
| 463--          | Acute tonsillitis                                         | 105,464                   |
| 4659-          | Acute upper respiratory infections of unspecified site    | 98,254                    |
| 4660-          | Acute bronchitis                                          | 82,706                    |
| 46619          | Acute bronchiolitis due to other infectious organisms     | 29,004                    |
| 4871-          | Influenza w/ other respiratory manifestations             | 168,862                   |
| 490--          | Bronchitis, not specified as acute or chronic             | 63,155                    |
| 5198-          | Other diseases of respiratory system                      | 4,281                     |
| 53550          | Unspecified gastritis                                     | 28,205                    |
| 5362-          | Persistent vomiting                                       | 4,089                     |
| 5589-          | Other and unspecified noninfectious gastroenteritis       | 51,454                    |
| 6929-          | Unspecified cause                                         | 8,366                     |
| 7231           | Cervicalgia                                               | 5,612                     |
| 7291-          | Myalgia and myositis, unspecified                         | 2,610                     |
| 7806-          | Pyrexia of unknown origin                                 | 142,369                   |
| 78079          | Other malaise and fatigue                                 | 71,162                    |

*Continued*

### Online Supplementary Data

<http://www.annfammed.org/cgi/content/full/3/5/400/DC1>

|                                                                                                                                                                                                                                                                                                                                   |                                          |                            |
|-----------------------------------------------------------------------------------------------------------------------------------------------------------------------------------------------------------------------------------------------------------------------------------------------------------------------------------|------------------------------------------|----------------------------|
| 7809-                                                                                                                                                                                                                                                                                                                             | Other general symptoms                   | 26,074                     |
| 7821-                                                                                                                                                                                                                                                                                                                             | Rash and other nonspecific skin eruption | 327                        |
| 7840-                                                                                                                                                                                                                                                                                                                             | Headache                                 | 20,052                     |
| 78701                                                                                                                                                                                                                                                                                                                             | Nausea with vomiting                     | 3,363                      |
| 78703                                                                                                                                                                                                                                                                                                                             | Vomiting alone                           | 6,248                      |
| 78791                                                                                                                                                                                                                                                                                                                             | Diarrhea                                 | 2,857                      |
| 7862-                                                                                                                                                                                                                                                                                                                             | Cough                                    | 1,068                      |
| 78900                                                                                                                                                                                                                                                                                                                             | Abdominal pain, unspecified site         | 71,158                     |
| <b>Total</b>                                                                                                                                                                                                                                                                                                                      |                                          | <b>2,175,551 ± 452,520</b> |
| <p>Note: Total includes ± relative standard error as calculated according to National Ambulatory Medical Care Survey and National Hospital Ambulatory Medical Care Survey guidelines.</p> <p>HIV = human immunodeficiency virus; ICD-9-CM = International Classification of Diseases, Ninth Revision – Clinical Modification.</p> |                                          |                            |

**Supplemental Table 2. Annual Number of Patients Visiting Physician's Offices, Emergency Departments, and Hospital Clinics With Rash and Other Top 3 Symptoms and Diagnoses Consistent With Primary HIV Infection**

| ICD-9-CM Codes | Diagnosis                                                     | Annual Number of Patients  |
|----------------|---------------------------------------------------------------|----------------------------|
| 00000          | Blank                                                         | 5,694                      |
| 0088-          | Enteritis due to other organism                               | 4,228                      |
| 0092-          | Infectious diarrhea                                           | 1,886                      |
| 0340-          | Streptococcal sore throat                                     | 77,304                     |
| 0579-          | Viral exanthem, unspecified                                   | 21,085                     |
| 07999          | Unspecified viral infection                                   | 82,013                     |
| 34690          | Migraine, unspecified without mention of intractable migraine | 13,603                     |
| 462--          | Acute pharyngitis                                             | 77,852                     |
| 6929-          | Unspecified cause                                             | 790,016                    |
| 6951-          | Erythema multiforme                                           | 19,250                     |
| 7245-          | Backache, unspecified                                         | 2,724                      |
| 7806-          | Pyrexia of unknown origin                                     | 6,145                      |
| 7821-          | Rash and other nonspecific skin eruption                      | 235,181                    |
| 7828-          | Changes in skin texture                                       | 770                        |
| 8470-          | Headache                                                      | 1,163                      |
| V990-          | Noncodable diagnosis/insufficient information                 | 4,675                      |
| V997-          | Diagnosis of "none"                                           | 471                        |
| <b>Total</b>   |                                                               | <b>1,344,060 ± 377,339</b> |

Note: Total includes  $\pm$  relative standard error as calculated according to National Ambulatory Medical Care Survey and National Hospital Ambulatory Medical Care Survey guidelines.

HIV = human immunodeficiency virus; ICD-9-CM = International Classification of Diseases, Ninth Revision – Clinical Modification.

**Supplemental Table 3. Annual Number of Patients Visiting Physician's Offices, Emergency Departments, and Hospital Clinics With Pharyngitis and Other Top 3 Symptoms and Diagnoses Consistent With Primary HIV Infection**

| ICD-9-CM Codes | Diagnosis                                                       | Annual Number of Patients  |
|----------------|-----------------------------------------------------------------|----------------------------|
| 00000          | Blank                                                           | 4,503                      |
| 0340-          | Streptococcal sore throat                                       | 780,323                    |
| 0341-          | Scarlet fever                                                   | 4,013                      |
| 4100           | Streptococcus, unspecified bacterial infection                  | 29,194                     |
| 0419-          | Bacterial infection, unspecified                                | 2,893                      |
| 075--          | Infectious mononucleosis                                        | 254,954                    |
| 0792-          | Coxsackie virus                                                 | 39,384                     |
| 07999          | Unspecified viral infection                                     | 129,696                    |
| 3829-          | Unspecified otitis media                                        | 269,578                    |
| 460--          | Acute nasopharyngitis-common cold                               | 17,364                     |
| 4619-          | Acute sinusitis-unspecified                                     | 39,400                     |
| 462--          | Acute pharyngitis                                               | 2,892,287                  |
| 463--          | Acute tonsillitis                                               | 518,177                    |
| 4640-          | Acute laryngitis                                                | 59,169                     |
| 46410          | Acute tracheitis w/o mention of obstruction                     | 5,150                      |
| 4658-          | Acute upper respiratory infections of multiple sites            | 103,738                    |
| 4659-          | Acute upper respiratory infections of unspecified site          | 950,033                    |
| 4660-          | Acute bronchitis                                                | 37,473                     |
| 47400          | Chronic tonsillitis                                             | 7,725                      |
| 490--          | Bronchitis, not specified as acute or chronic                   | 134,876                    |
| 5198-          | Other diseases of respiratory system, not elsewhere classified  | 4,281                      |
| 53081          | Esophageal reflux                                               | 5,150                      |
| 5589-          | Other and unspecified noninfectious gastroenteritis and colitis | 71,162                     |
| 7231-          | Cervicalgia                                                     | 2,425                      |
| 7291-          | Myalgia and myositis, unspecified                               | 4,913                      |
| 7806-          | Pyrexia of unknown origin                                       | 28,919                     |
| 7822-          | Localized superficial swelling, mass, or lump                   | 1,063                      |
| 7840-          | Headache                                                        | 5,080                      |
| 7841-          | Throat pain                                                     | 6,819                      |
| 78791          | Diarrhea                                                        | 1,933                      |
| 78900          | Abdominal pain of unspecified site                              | 2,540                      |
| V997-          | Diagnosis of "none"                                             | 896                        |
| <b>Total</b>   |                                                                 | <b>6,415,111 ± 886,258</b> |

Note: Total includes  $\pm$  relative standard error as calculated per NAMCS/NHAMCS guidelines.

HIV = human immunodeficiency virus; NAMCS = National Ambulatory Medical Care Survey; NHAMCS = National Hospital Ambulatory Medical Care Survey.

**Supplemental Table 4. Numerator Estimate: Annual Number of Patients Aged 13 to 54 Years With Primary HIV Infection Visiting Physician Offices, Emergency Departments, and Hospital Clinics With Fever, Rash, or Pharyngitis**

| Characteristics                                        | Symptom                   |                        |                         |
|--------------------------------------------------------|---------------------------|------------------------|-------------------------|
|                                                        | Fever                     | Rash                   | Pharyngitis             |
| Annual new HIV infections, No.                         | 40,000                    | 40,000                 | 40,000                  |
| Ambulatory patients represented by NAMCS and NHAMCS, % | 90                        | 90                     | 90                      |
| Patients seeking care, %                               | 50                        | 50                     | 50                      |
| Primary HIV infections for age-group, %                | 95.2                      | 95.2                   | 95.2                    |
| PHI patients with symptom, % (95% CI)                  | 84 (78-90)                | 44 (35-53)             | 50 (41-59)              |
| Numerator estimate (95% CI)                            | 14,394<br>(13,880-15,936) | 7,540<br>(5,998-9,082) | 8,568<br>(7,026-10,436) |

Note: 40,000 was multiplied by the percentages in columns 3-6 to obtain the numerator estimate in column 7.

HIV = human immunodeficiency virus; PHI = primary HIV infection; CI = confidence interval.
